# Supplementary material for: The role of fluoride in anion–π interaction with naphthalene diimide
Source: Royal Society of Chemistry journal article supplement (doi:10.1039/c9cc01795j), 2019-01-01
Supplement: c9cc01795j1.pdf [file c9cc01795j1.pdf]

## Supporting Information

### The Role of Fluoride in the Anion- $\pi$ Interaction with Naphthalene Diimide

Teck Lip Dexter Tam,\* Jian Wei Xu\*

Institute of Materials Research and Engineering (IMRE), Agency of Science, Technology and Research (A\*STAR), 2 Fusionopolis Way, Innovis, #08-03, Singapore 138634, Singapore.

#### Experimental Section

##### General Procedures

All reagents were purchased from Sigma Aldrich. 2,6-Dibromo-*N,N'*-bis(2-ethylhexyl)-1,8:4,5-naphthalenetetracarboxylic diimide (Br<sub>2</sub>-NDI) was purchased from TCI. *N,N'*-bis(2-ethylhexyl)-1,4,5,8-naphthalenetetracarboxylic diimide (NDI) was synthesized according to literature.<sup>1</sup> <sup>1</sup>H, <sup>19</sup>F and <sup>13</sup>C{<sup>1</sup>H} NMR were performed on JEOL 500MHz NMR system with chemical shifts referenced to the deuterated solvent. ESI-MS measurements were performed on Shimadzu LCMS-IT-TOF, isotope distribution patterns were used as a composition proof in addition to *m/z* signal. Elemental analysis was carried out using CHNS FlashEA 1112 Elemental Analyzer from Thermo Fisher Scientific. UV-Vis-NIR absorption spectra were recorded on a Shimadzu UV-3101PC UV-VIS-NIR Spectrophotometer. Cyclic voltammetry (CV) experiments were performed using Autolab potentiostat (model PGSTAT30) by Echochimie. All CV measurements were recorded in dry THF with 0.1 M tetra-*n*-butylammonium hexafluorophosphate as supporting electrolyte (scan rate of 100 mV•s<sup>-1</sup>), glassy carbon disk as working electrode, gold disk as counter electrode and Ag/AgCl as reference electrode. Ferrocene was used as external standard (HOMO = oxidation onset = -4.80 eV). HOMO/LUMO values of the compounds were calculated using the formula: -4.80 - (oxidation/reduction onset of compound). Continuous wave X-band ESR spectra were obtained with a JEOL (FA200) spectrometer at room temperature using dry THF as solvent. Microwave frequency, 9.1938 GHz; power, 6.39 mW; modulation frequency, 100 kHz

##### Reaction between NDI and TBAF in THF with bubbling of compressed dry air

NDI-OH: 100 mg (0.20 mmol) of NDI, 257 mg (0.81 mmol) of TBAF and 50 mL of anhydrous inhibitor-free THF were added to a round bottom flask. The reaction was stirred at 25 °C with continuous bubbling of compressed dry air for 2 hours. The reaction mixture was poured into DI water and extracted using dichloromethane. The organic layer was collected, dried using anhydrous sodium sulphate, filtered and concentrated. Pure NDI-OH was obtained as light yellow solid by preparative thin-layer chromatography (silica gel matrix) using dichloromethane as eluent. Yield = 5 – 10%. <sup>1</sup>H NMR (500 MHz, Methylene Chloride-*d*<sub>2</sub>)  $\delta$  12.95 (s, 1H), 8.70 (d, *J* = 7.7 Hz, 1H), 8.53 (d, *J* = 7.7 Hz, 1H), 8.26 (s, 1H), 4.17-4.05 (m, 4H), 1.98-1.86 (m, 2H), 1.41-1.29 (m, 16H), 0.95-0.86 (m, 12H). <sup>13</sup>C{<sup>1</sup>H} NMR (126 MHz, Methylene Chloride-*d*<sub>2</sub>)  $\delta$  169.45, 165.00, 163.78, 163.52, 163.17, 132.19, 129.88, 128.36, 127.83, 127.41, 125.17, 124.95, 121.84, 105.98, 54.00, 45.03, 44.53, 38.50, 38.41, 31.20, 31.18, 29.17, 29.14, 24.53, 24.52, 23.60, 23.59, 14.40,

10.91, 10.90. Anal. Calcd for  $C_{30}H_{38}N_2O_5$ : C, 71.12; H, 7.56; N, 5.53; O, 15.79. Found: C, 71.01; H, 7.75; N, 5.43. HR-ESI-MS  $m/z$ : 507.2859; calcd for  $C_{30}H_{38}N_2O_5+H^+$  = 507.2853.

#### Reaction between Br<sub>2</sub>-NDI and TBAF in THF

Br-NDI-OH: 259 mg (0.40 mmol) of Br<sub>2</sub>-NDI, 505 mg (1.60 mmol) of TBAF and 100 mL of anhydrous inhibitor-free THF were added to a round bottom flask. The reaction was stirred at 25 °C for 2 hours. The reaction mixture was poured into DI water and extracted using dichloromethane. The organic layer was collected, dried using anhydrous sodium sulphate, filtered and concentrated. Pure Br-NDI-OH was obtained as yellow solid by column chromatography (silica gel) using 100% hexane → 30% hexane + 70% dichloromethane as eluent. Yield = 67%. <sup>1</sup>H NMR (500 MHz, Chloroform-*d*) δ 12.89 (s, 1H), 8.94 (s, 1H), 8.37 (s, 1H), 4.21 – 4.08 (m, 4H), 1.99 – 1.88 (m, 2H), 1.35 (m, 16H), 0.97 – 0.85 (m, 12H). <sup>13</sup>C{<sup>1</sup>H} NMR (126 MHz, Chloroform-*d*) δ <sup>13</sup>C NMR (126 MHz, CHLOROFORM-*D*) δ 168.62, 164.23, 162.05, 161.81, 161.48, 139.22, 128.86, 127.06, 125.57, 124.32, 124.27, 124.25, 123.39, 105.62, 77.16, 45.25, 44.42, 37.96, 37.89, 30.78, 30.75, 28.69, 28.67, 24.12, 23.23, 23.16, 14.22, 10.74, 10.69. Anal. Calcd for  $C_{30}H_{37}BrN_2O_5$ : C, 61.54; H, 6.37; Br, 13.65; N, 4.78; O, 13.66. Found: C, 61.35; H, 6.51; N, 4.71. HR-ESI-MS  $m/z$ : 585.1955; calcd for  $C_{30}H_{37}BrN_2O_5+H^+$  = 585.1959.

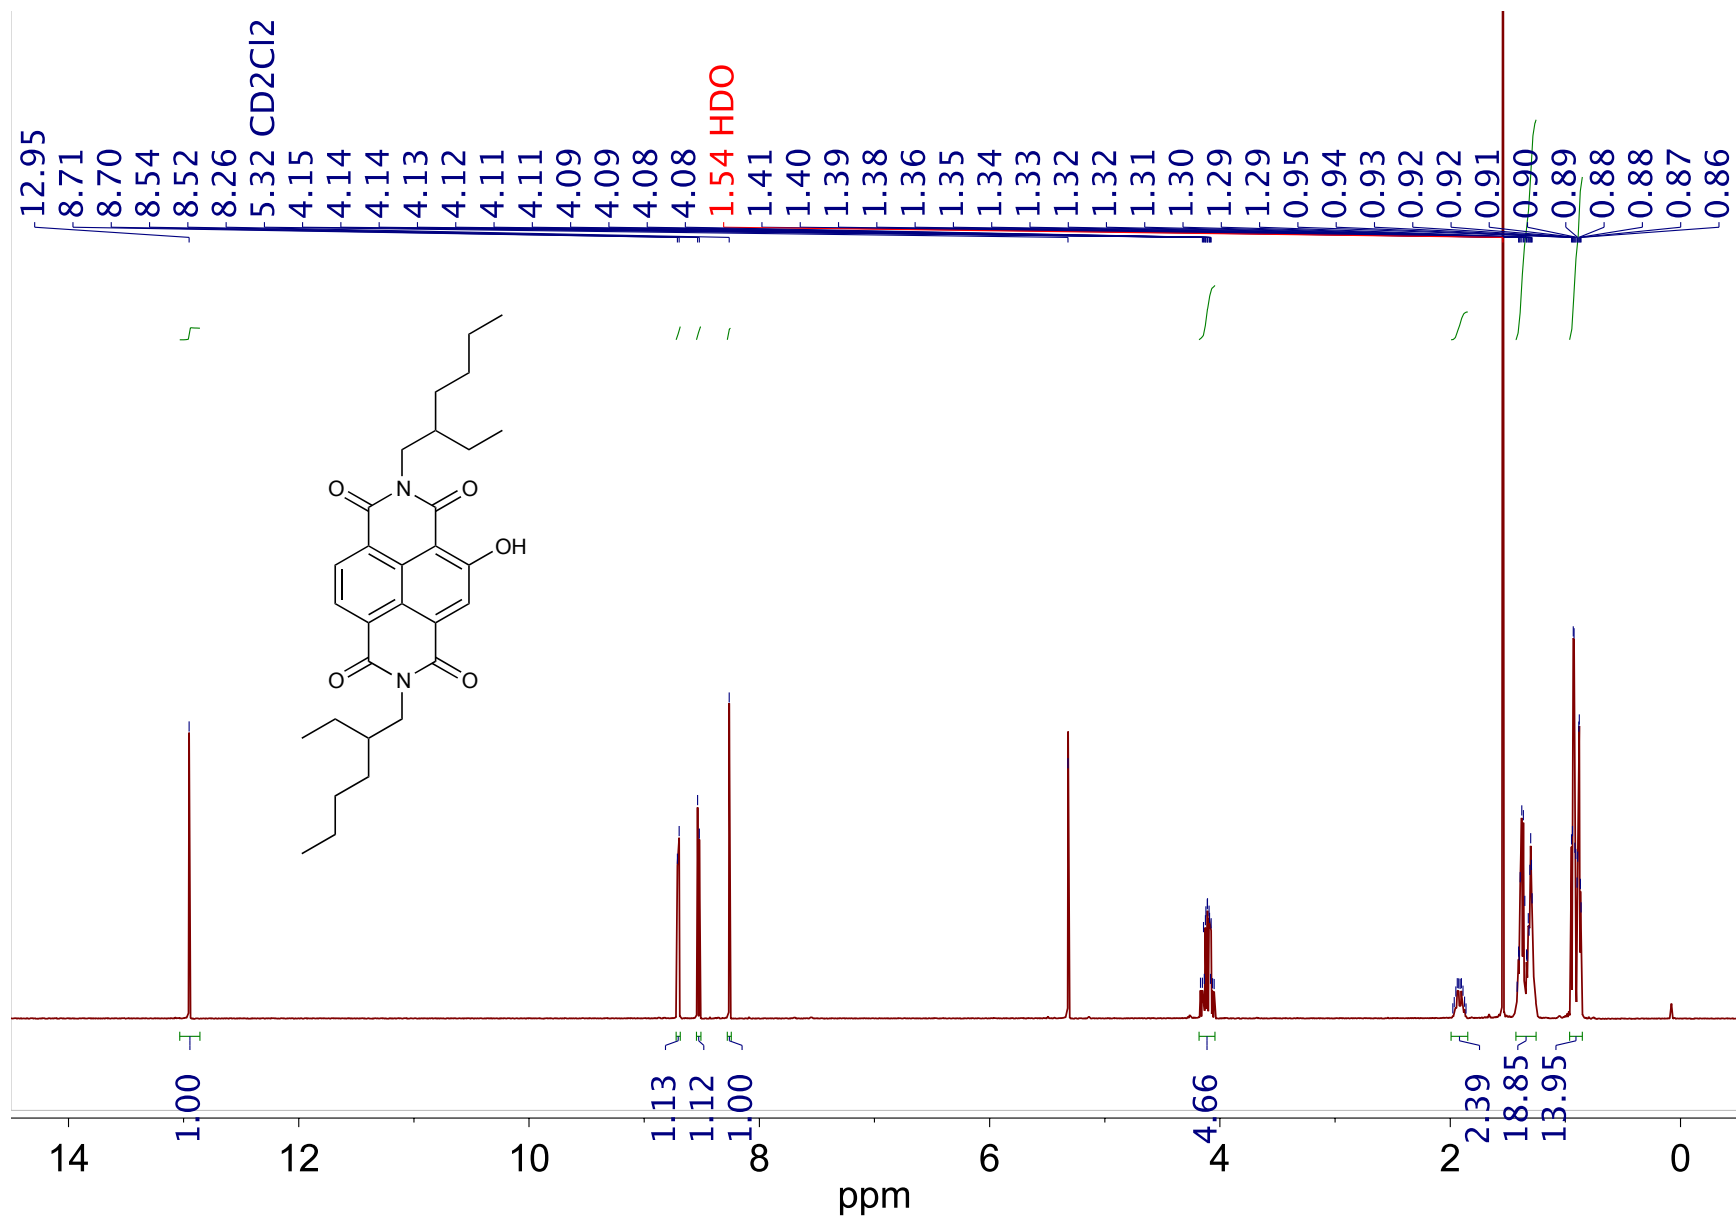

Figure S1. <sup>1</sup>H NMR of NDI-OH.

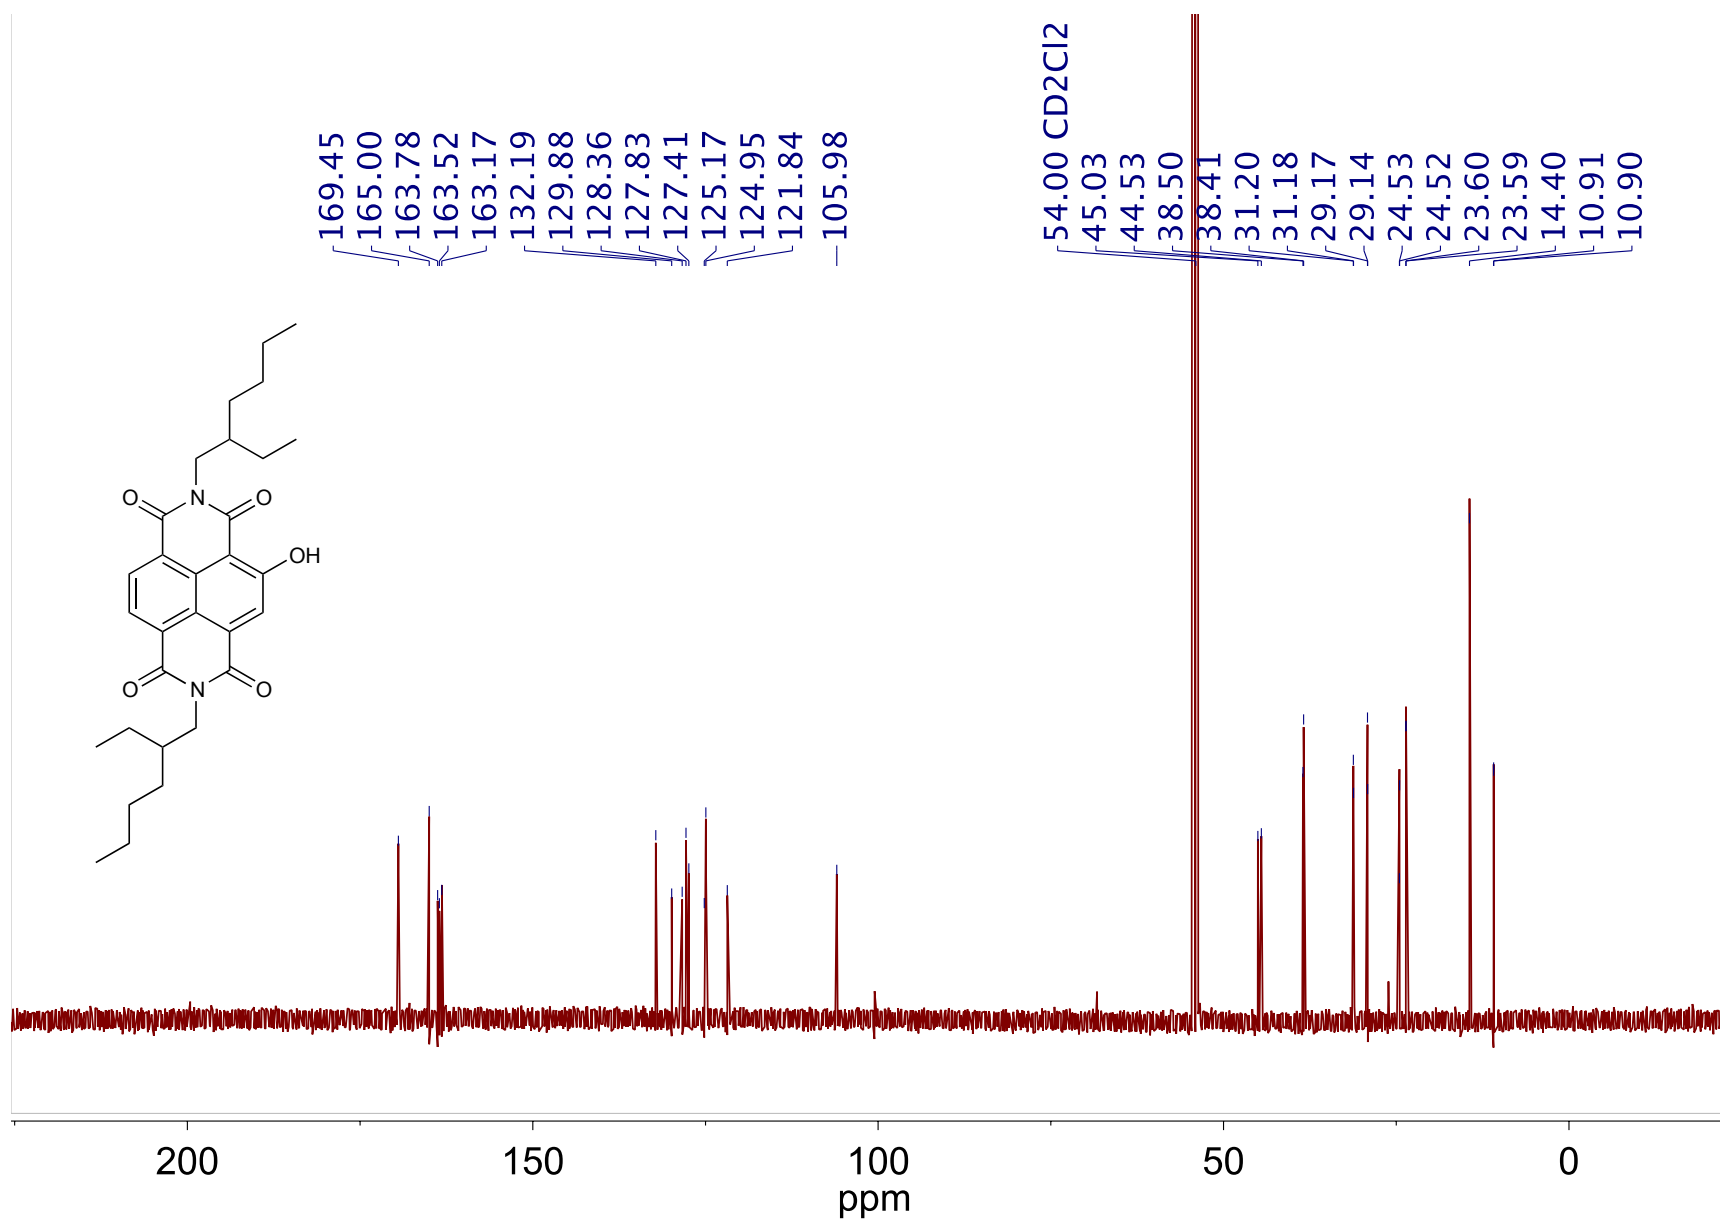

Figure S2.  $^{13}\text{C}\{^1\text{H}\}$  NMR of NDI-OH.

**Acquisition Parameter**

|             |            |                       |           |                  |           |
|-------------|------------|-----------------------|-----------|------------------|-----------|
| Source Type | ESI        | Ion Polarity          | Positive  | Set Nebulizer    | 2.0 Bar   |
| Focus       | Not active | Set Capillary         | 4500 V    | Set Dry Heater   | 200 °C    |
| Scan Begin  | 50 m/z     | Set End Plate Offset  | -500 V    | Set Dry Gas      | 6.0 l/min |
| Scan End    | 1000 m/z   | Set Collision Cell RF | 300.0 Vpp | Set Divert Valve | Waste     |

| Meas. m/z | # | Formula                                                       | m/z      | err [ppm] | rdB  | e <sup>-</sup> | Conf | N-Rule |
|-----------|---|---------------------------------------------------------------|----------|-----------|------|----------------|------|--------|
| 507.2859  | 1 | C <sub>30</sub> H <sub>39</sub> N <sub>2</sub> O <sub>5</sub> | 507.2853 | -1.0      | 12.5 | even           |      | ok     |

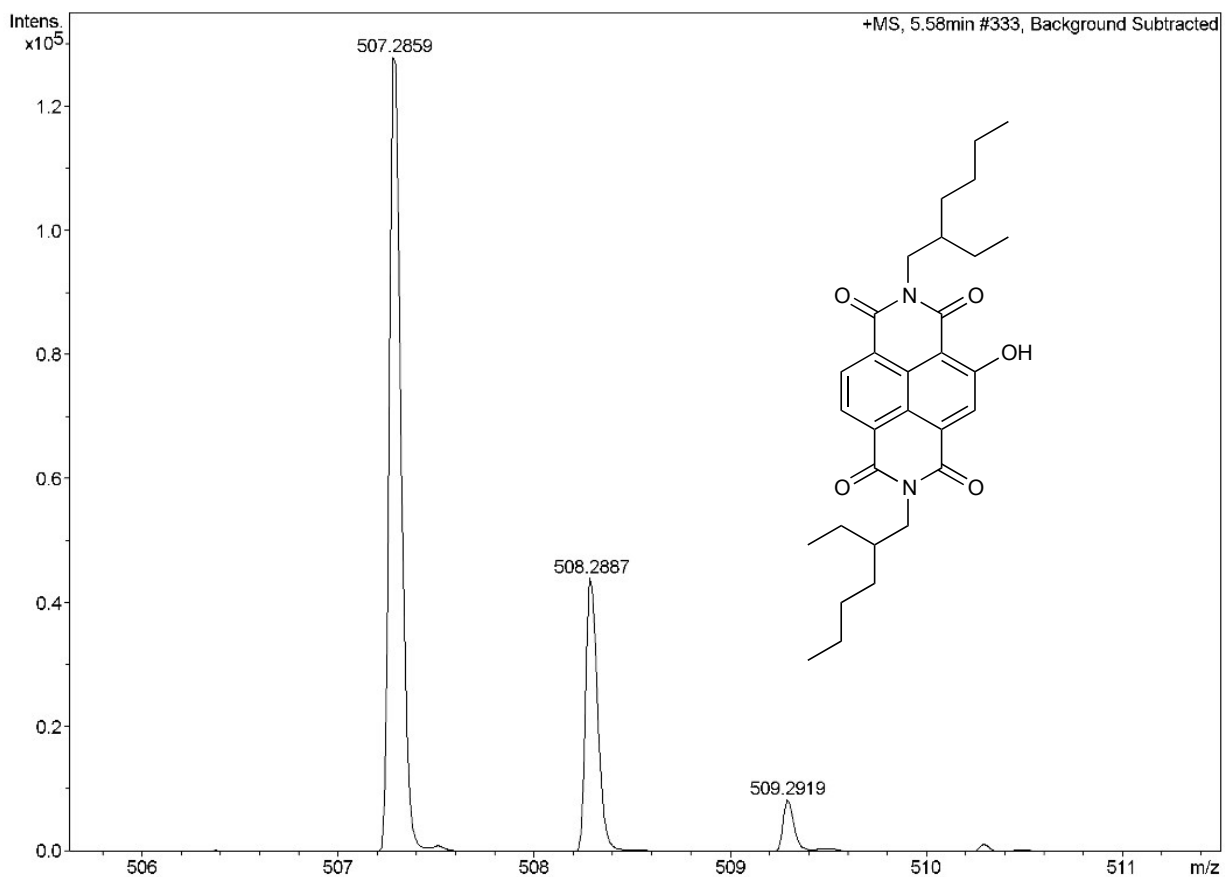

Figure S3. HR-ESI-MS (positive mode) of NDI-OH

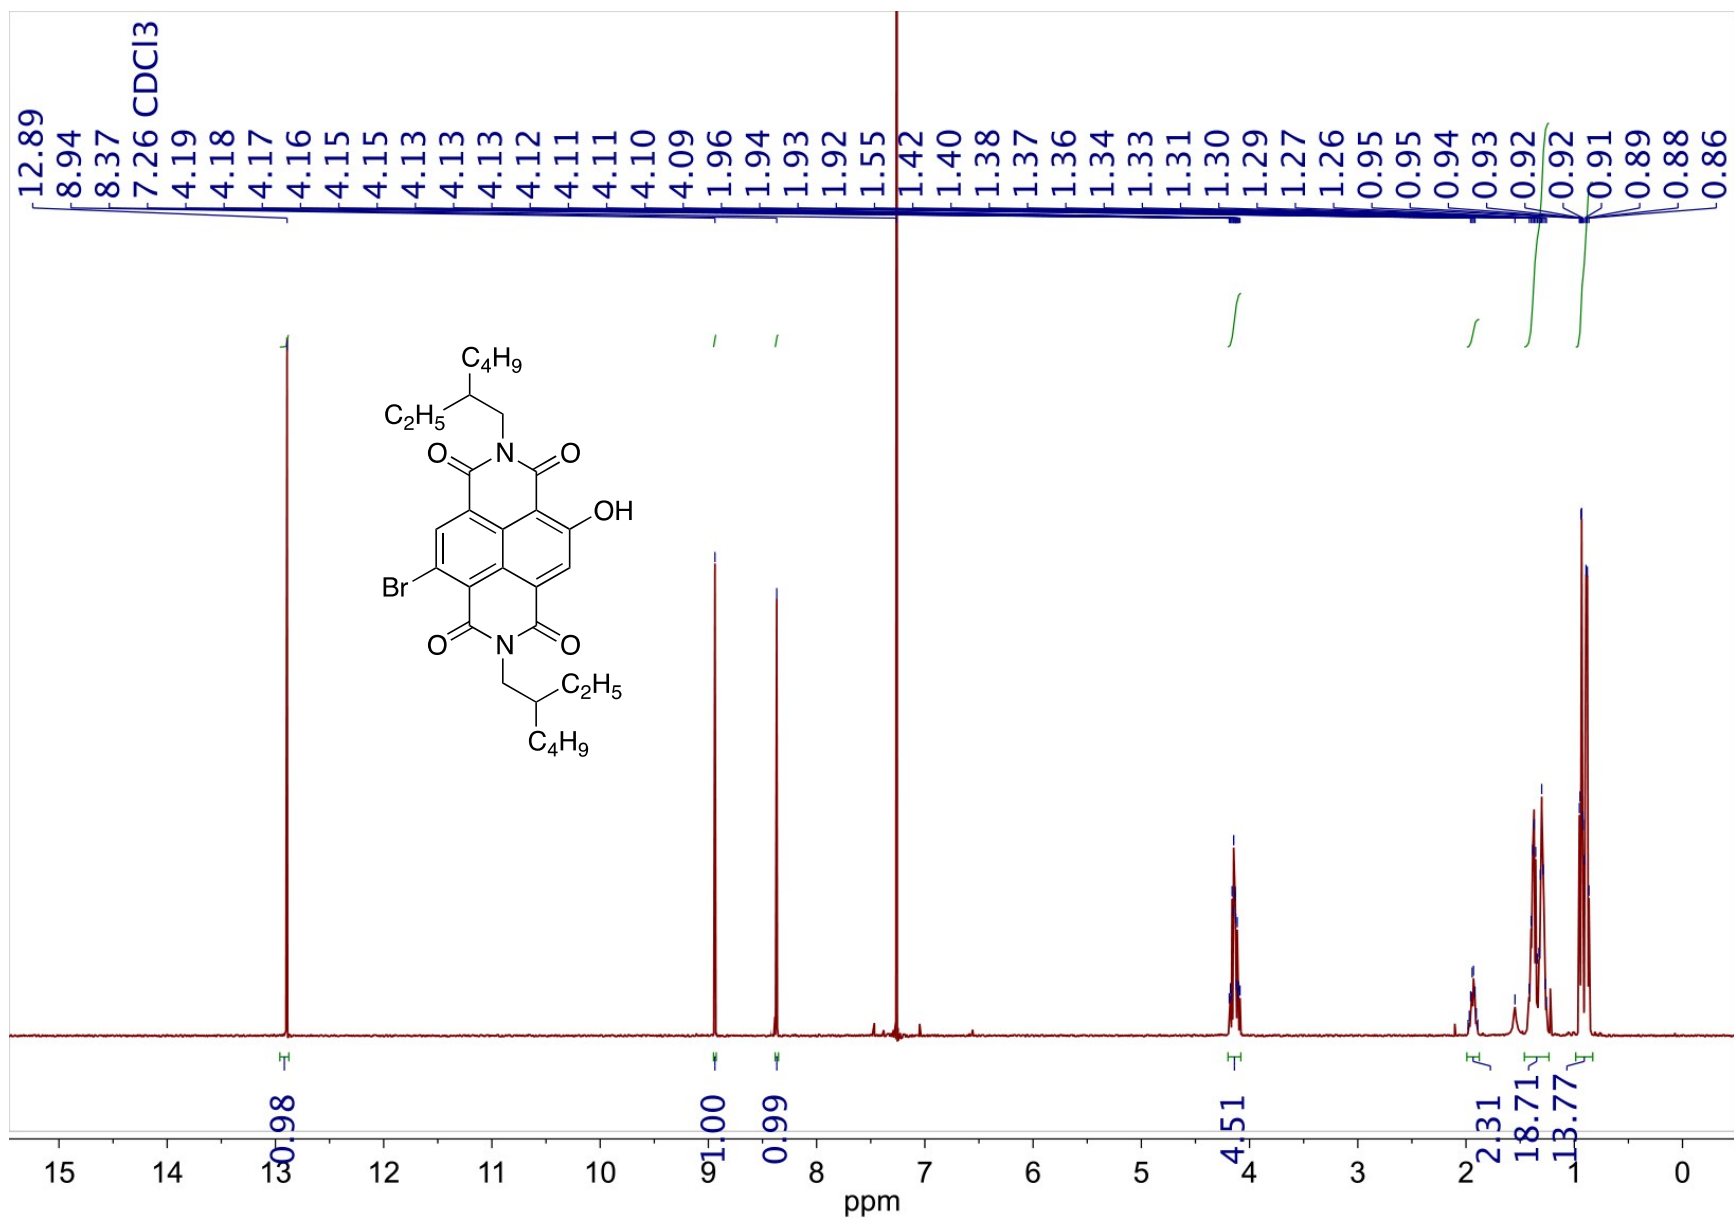

Figure S4. <sup>1</sup>H NMR of Br-NDI-OH.

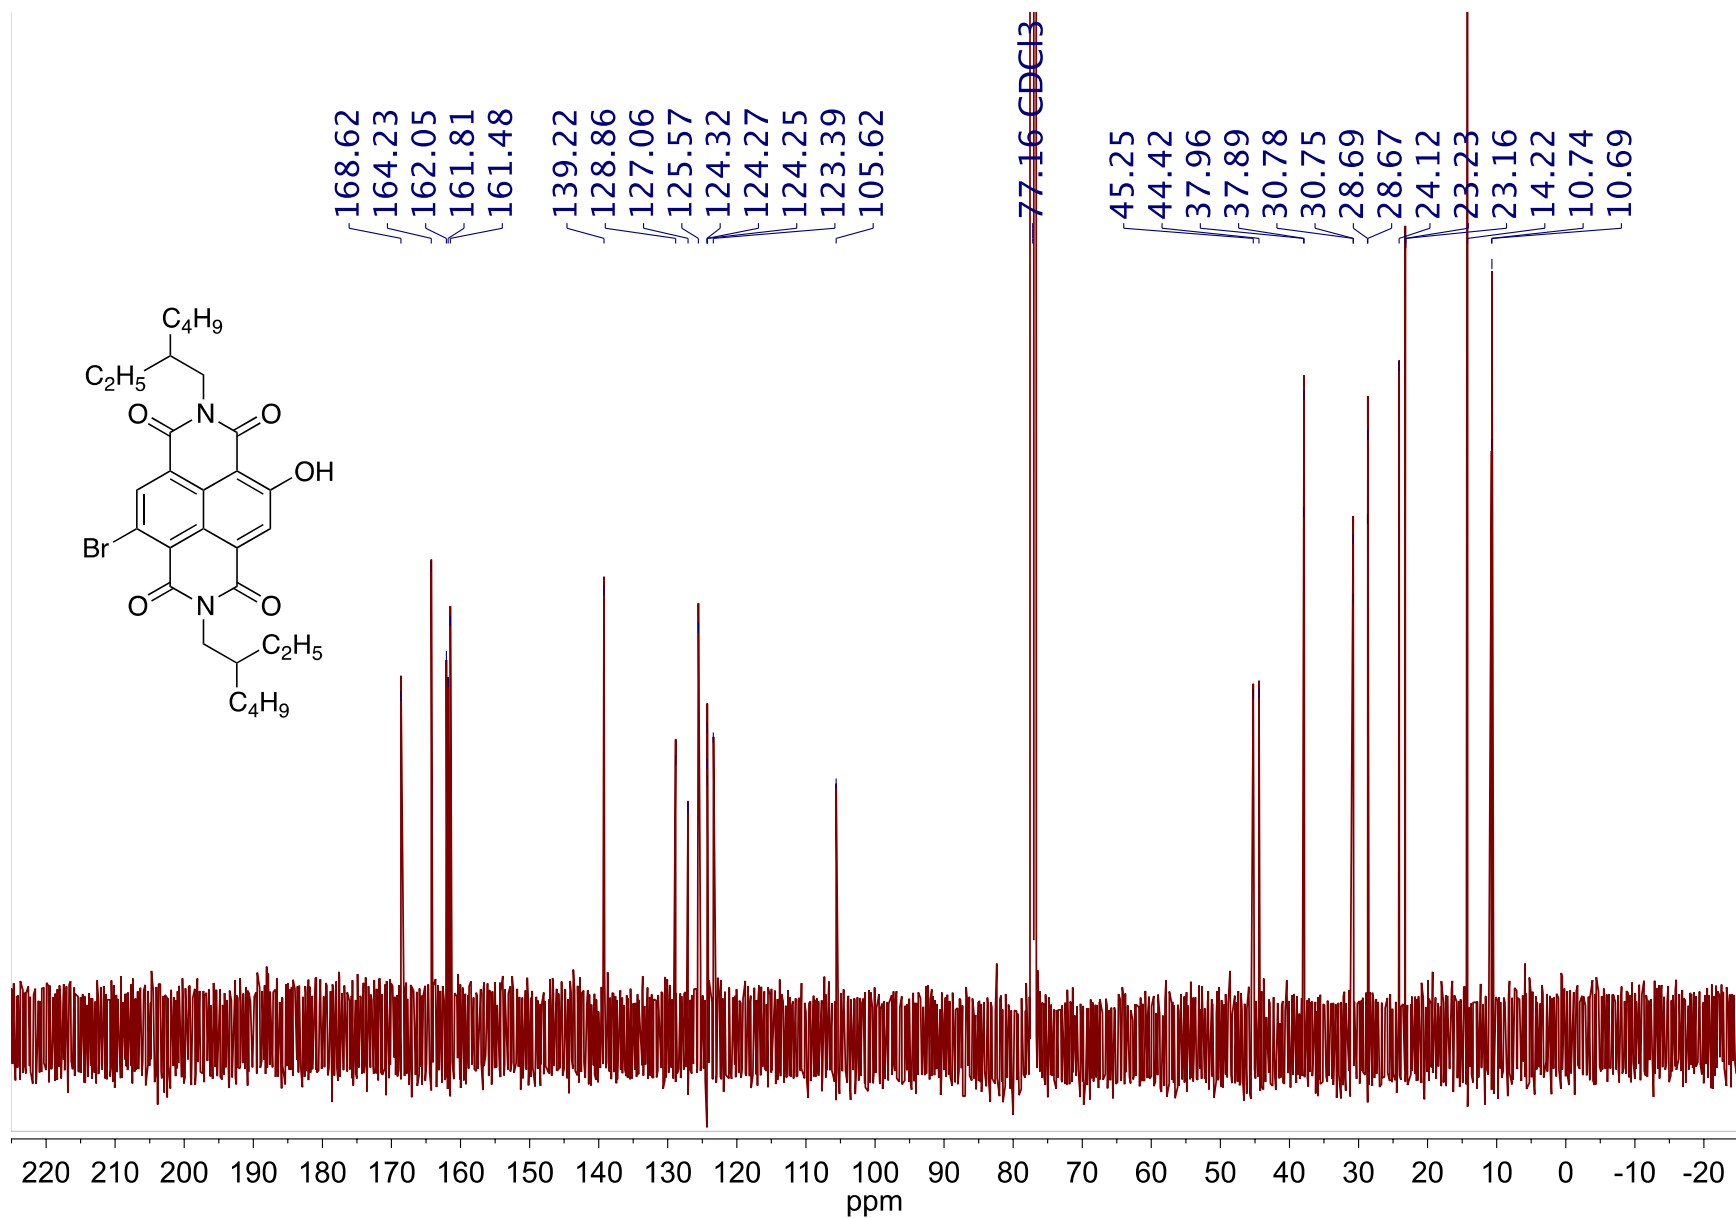

Figure S5. <sup>13</sup>C{<sup>1</sup>H} NMR of Br-NDI-OH.

**Acquisition Parameter**

|             |            |                       |           |                  |           |
|-------------|------------|-----------------------|-----------|------------------|-----------|
| Source Type | ESI        | Ion Polarity          | Positive  | Set Nebulizer    | 2.0 Bar   |
| Focus       | Not active | Set Capillary         | 4500 V    | Set Dry Heater   | 200 °C    |
| Scan Begin  | 50 m/z     | Set End Plate Offset  | -500 V    | Set Dry Gas      | 6.0 l/min |
| Scan End    | 1000 m/z   | Set Collision Cell RF | 300.0 Vpp | Set Divert Valve | Waste     |

| Meas. m/z | # | Formula                                                         | m/z      | err [ppm] | rdb  | e <sup>-</sup> Conf | N-Rule |
|-----------|---|-----------------------------------------------------------------|----------|-----------|------|---------------------|--------|
| 585.1955  | 1 | C <sub>30</sub> H <sub>38</sub> BrN <sub>2</sub> O <sub>5</sub> | 585.1959 | 0.7       | 12.5 | even                | ok     |

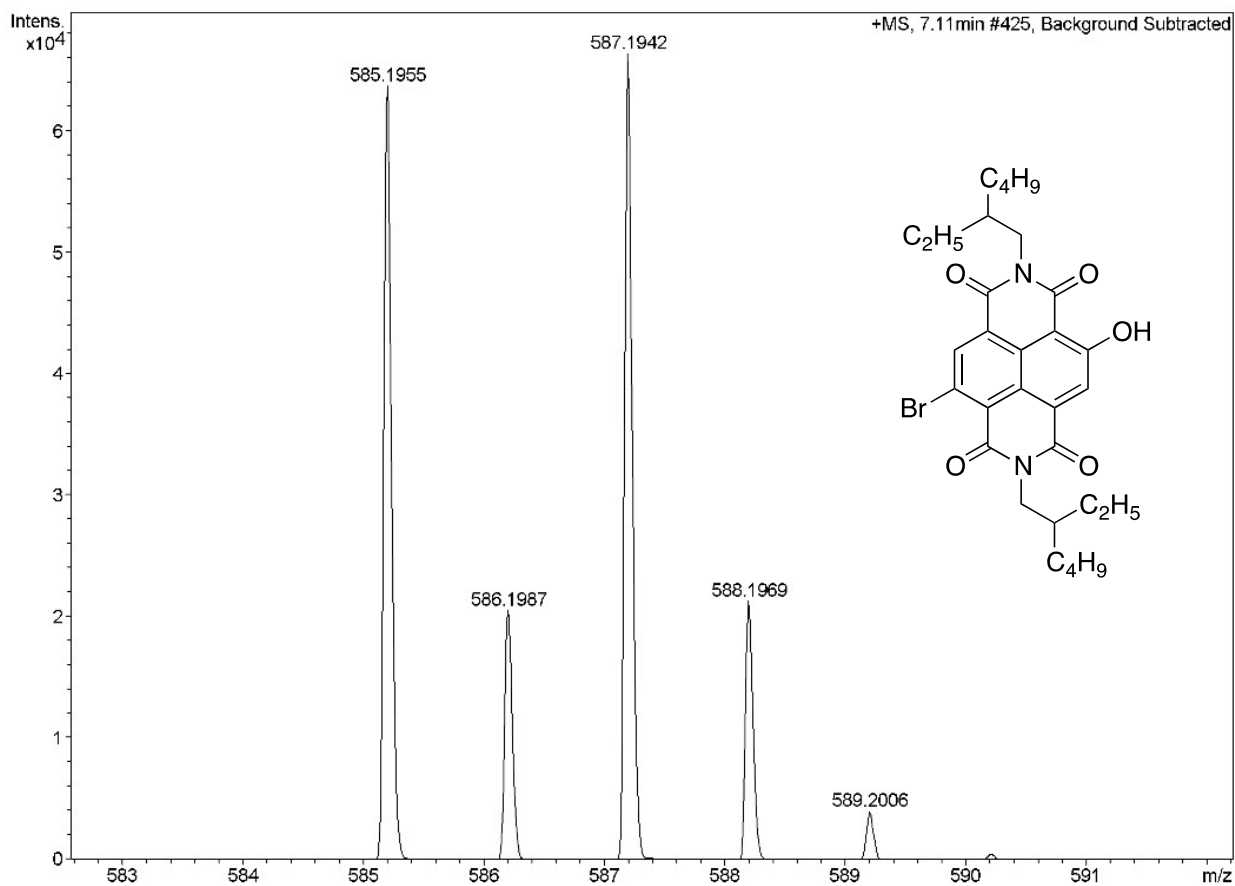

Figure S6. HR-ESI-MS (positive mode) of Br-NDI-OH.



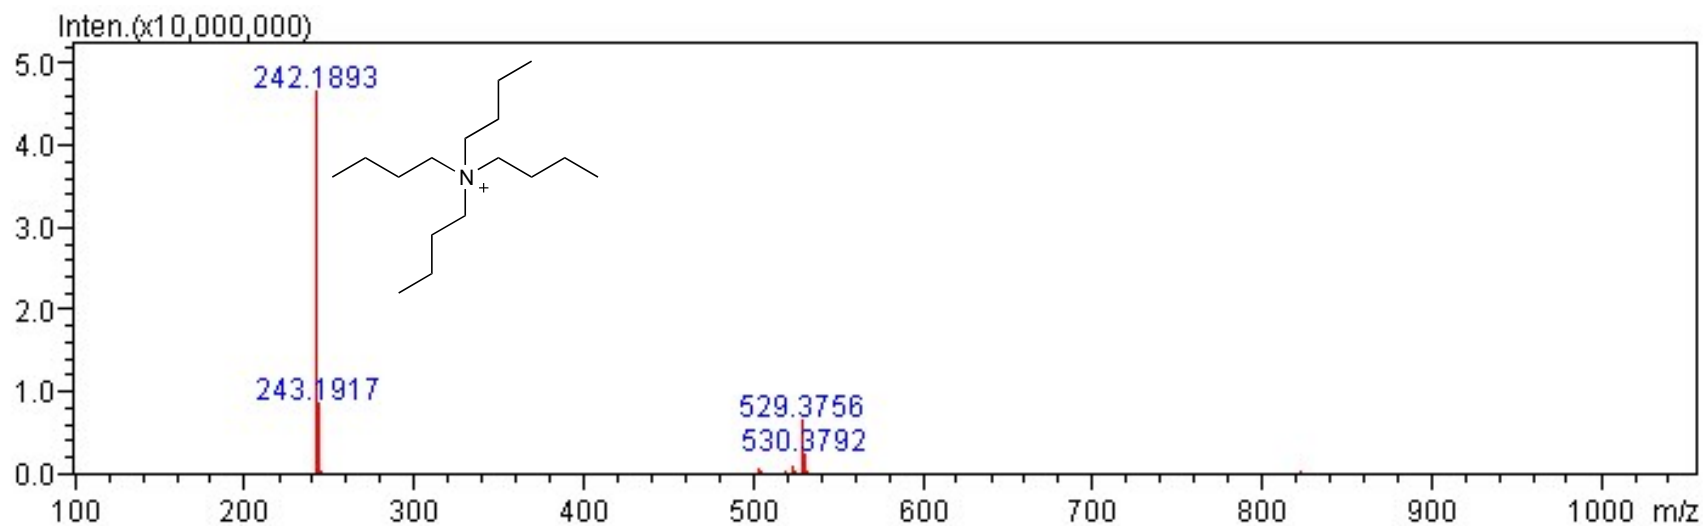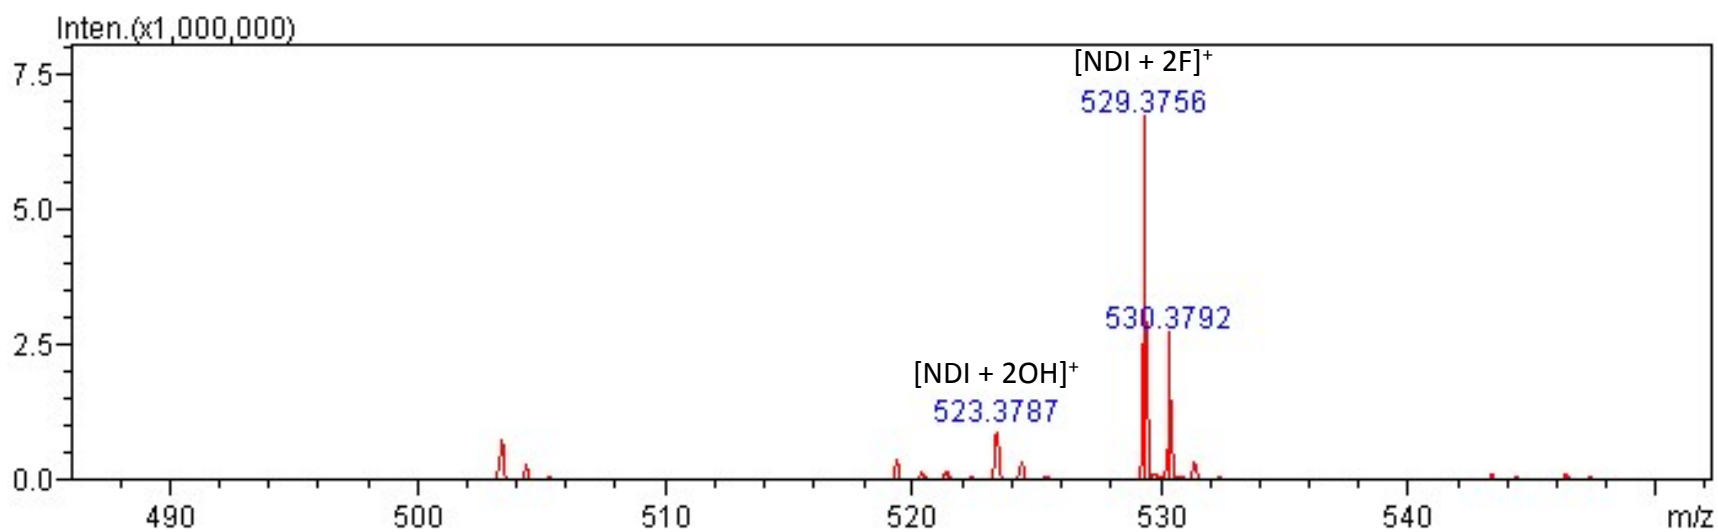

Figure S7. ESI-MS (positive mode) of the reaction between NDI and TBAF in THF. Top: zoom out. Bottom: zoom in.

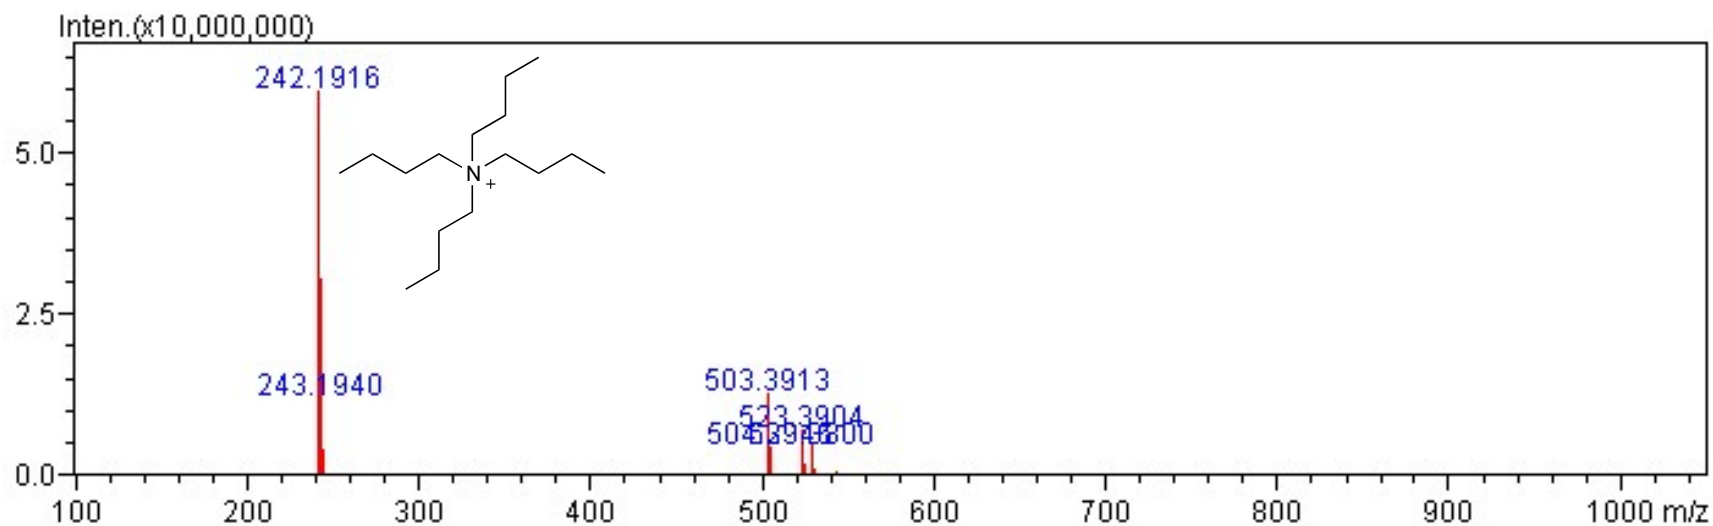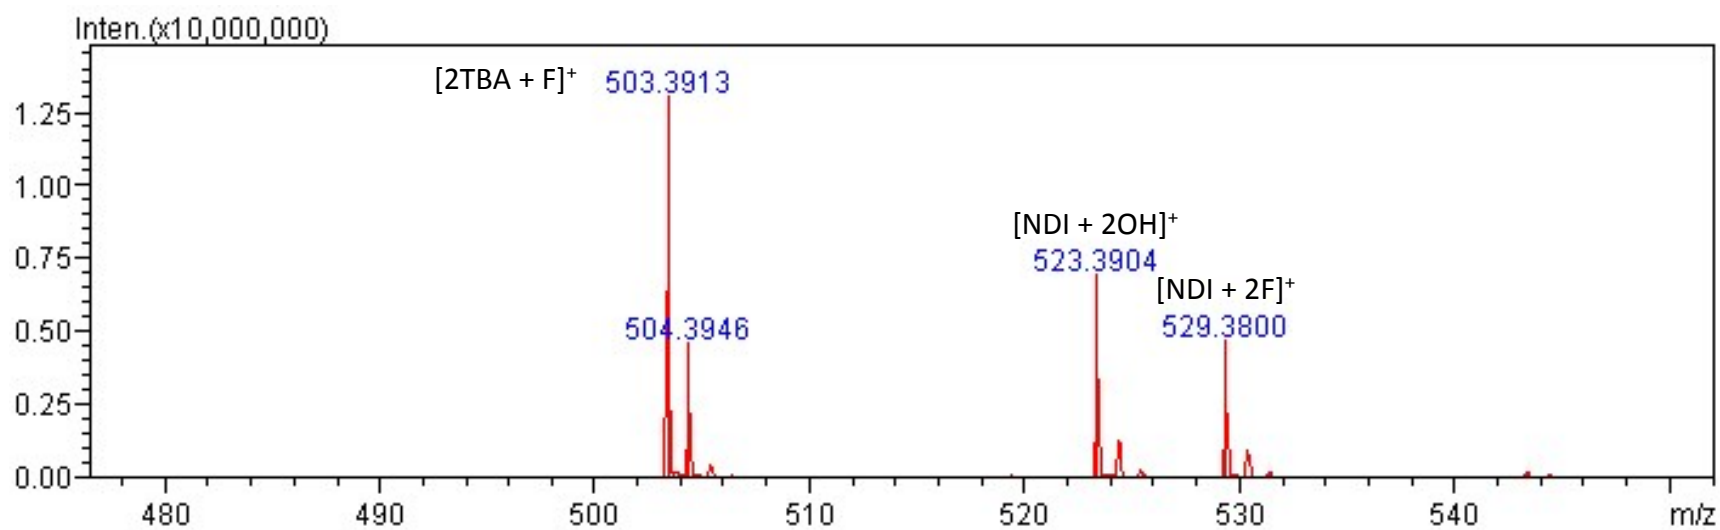

Figure S8. ESI-MS (positive mode) of the reaction between NDI and TBAF in THF with bubbling of CDA. Top: zoom out. Bottom: zoom in.

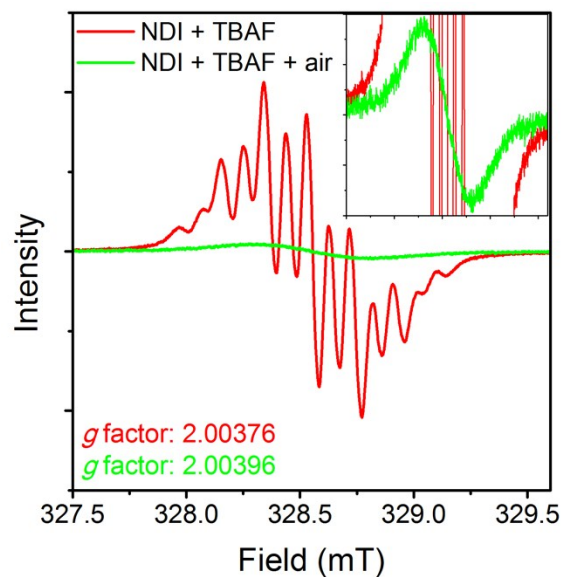

Figure S9. EPR of freshly prepared deaerated NDI with the addition of 4 equivalence of TBAF in anhydrous THF, followed by bubbling with CDA for 2 hours. Inset: magnification of EPR signal of the latter.

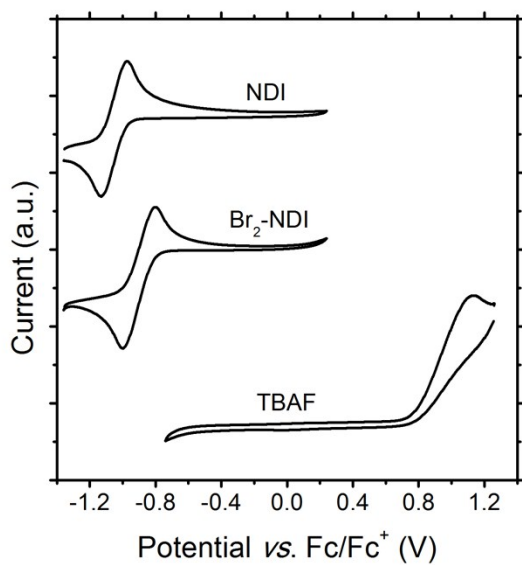

Figure S10. Cyclic voltammogram of NDI, Br<sub>2</sub>-NDI and TBAF in THF.

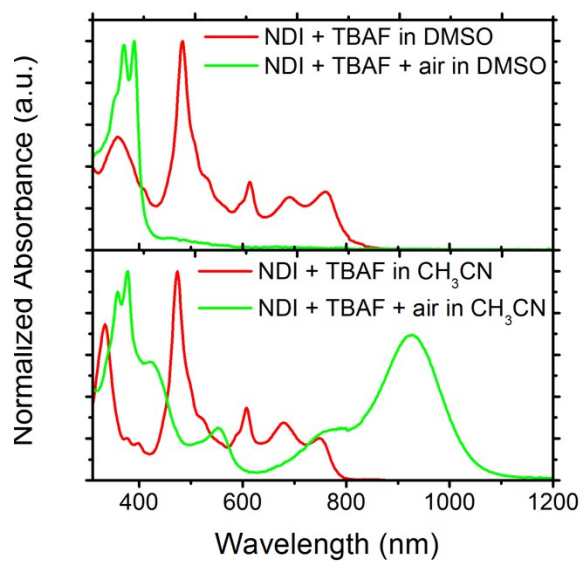

Figure S11. Solution UV-Vis of NDI + TBAF in DMSO (top) and acetonitrile (bottom) before and after bubbling with air.

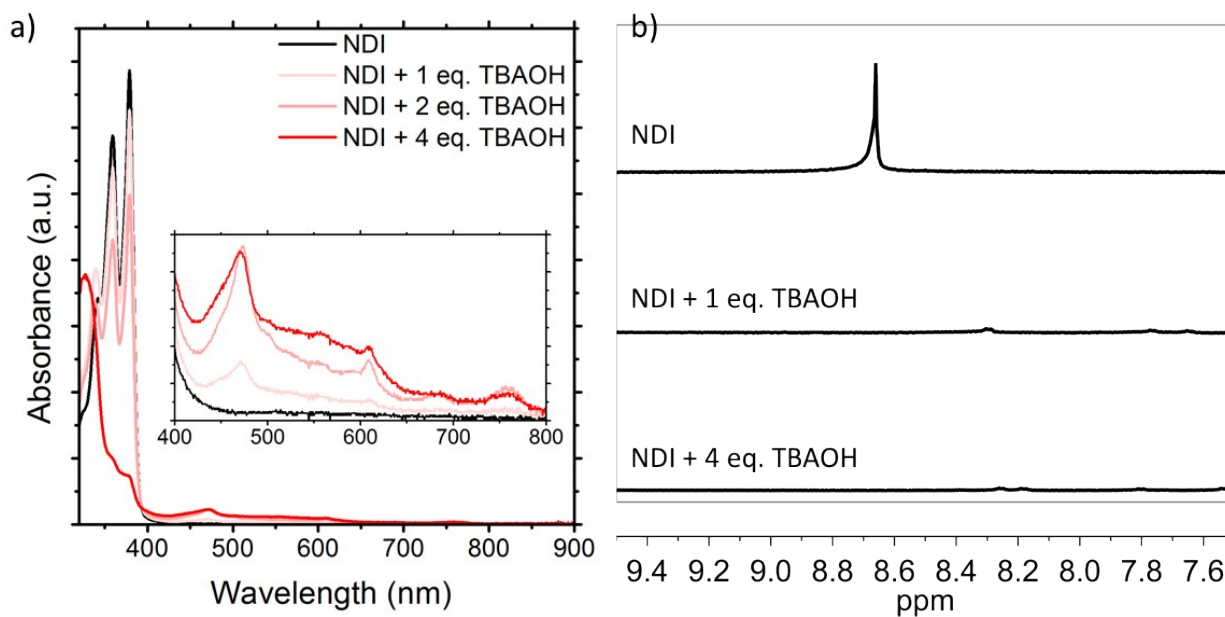

Figure S12. a) Solution UV-Vis absorption spectra of NDI upon addition of tetrabutylammonium hydroxide 30-hydrate (TBAOH) and b) <sup>1</sup>H NMR of NDI, followed by addition of TBAOH.

### DFT calculations

DFT calculations were carried out using the Gaussian 09 program suite.<sup>2</sup> Geometry optimization was carried out in the gas-phase using CAM-B3LYP 6-311G+ (d,p) for the NDI unit and LanL2DZPD<sup>3</sup> for F<sup>-</sup>/OH<sup>-</sup>. Frequency checks were carried out to ensure all geometries are global minimum structures. Single-point calculation was carried out on the optimized geometry using the keyword counterpoise=2 to obtain the BSSE corrected interaction energy. For the enthalpy of electron transfer between NDI and F<sup>-</sup>/OH<sup>-</sup>, these structures were optimized using solvation model IEF-PCM (THF) and frequency checks were performed to ensure these geometries are global minimum. No global minimum could be found for the complexes when various solvation model was applied.

F<sup>-</sup> close-shell singlet RCAM-B3LYP LanL2DZPD

G energy (IEFPCM, THF) = -99.989901

F<sup>•</sup> open-shell doublet UCAM-B3LYP LanL2DZPD

G energy (IEFPCM, THF) = -99.747372

OH<sup>-</sup> close-shell singlet RCAM-B3LYP LanL2DZPD

G energy (IEFPCM, THF) = -75.915416

OH<sup>•</sup> open-shell doublet RCAM-B3LYP LanL2DZPD

G energy (IEFPCM, THF) = -75.742616

NDI close-shell singlet RCAM-B3LYP 6-311G+ (d,p)

G energy (IEFPCM, THF) = -1025.836838

| Center<br>Number | Atomic<br>Number | Atomic<br>Type | Coordinates (Angstroms) |           |           |
|------------------|------------------|----------------|-------------------------|-----------|-----------|
|                  |                  |                | X                       | Y         | Z         |
| 1                | 6                | 0              | 2.410667                | 0.710017  | 0.000000  |
| 2                | 6                | 0              | 1.223059                | 1.399749  | 0.000000  |
| 3                | 6                | 0              | 2.415005                | -0.694484 | 0.000000  |
| 4                | 6                | 0              | -0.002330               | 0.704162  | 0.000000  |
| 5                | 6                | 0              | 1.223059                | 2.882337  | 0.000000  |
| 6                | 6                | 0              | 1.232081                | -1.392819 | 0.000000  |
| 7                | 1                | 0              | 3.349864                | -1.238757 | 0.000000  |
| 8                | 6                | 0              | -1.232081               | 1.392819  | 0.000000  |
| 9                | 6                | 0              | 0.002330                | -0.704162 | 0.000000  |
| 10               | 7                | 0              | -0.012907               | 3.521856  | 0.000000  |
| 11               | 8                | 0              | 2.247146                | 3.533211  | 0.000000  |
| 12               | 6                | 0              | 1.249718                | -2.877266 | 0.000000  |
| 13               | 6                | 0              | -1.249718               | 2.877266  | 0.000000  |
| 14               | 6                | 0              | -2.415005               | 0.694484  | 0.000000  |
| 15               | 6                | 0              | -1.223059               | -1.399749 | 0.000000  |
| 16               | 6                | 0              | 0.017068                | 4.986156  | 0.000000  |
| 17               | 7                | 0              | 0.012907                | -3.521856 | 0.000000  |
| 18               | 8                | 0              | 2.286946                | -3.505873 | 0.000000  |
| 19               | 8                | 0              | -2.286946               | 3.505873  | 0.000000  |
| 20               | 6                | 0              | -2.410667               | -0.710017 | 0.000000  |
| 21               | 1                | 0              | -3.349864               | 1.238757  | 0.000000  |
| 22               | 6                | 0              | -1.223059               | -2.882337 | 0.000000  |
| 23               | 1                | 0              | -1.006075               | 5.343818  | 0.000000  |
| 24               | 1                | 0              | 0.540092                | 5.343341  | 0.885545  |
| 25               | 1                | 0              | 0.540092                | 5.343341  | -0.885545 |
| 26               | 6                | 0              | -0.017068               | -4.986156 | 0.000000  |
| 27               | 8                | 0              | -2.247146               | -3.533211 | 0.000000  |
| 28               | 1                | 0              | -0.540092               | -5.343341 | -0.885545 |
| 29               | 1                | 0              | 1.006075                | -5.343818 | 0.000000  |
| 30               | 1                | 0              | -0.540092               | -5.343341 | 0.885545  |
| 31               | 1                | 0              | 3.342101                | 1.260262  | 0.000000  |
| 32               | 1                | 0              | -3.342101               | -1.260262 | 0.000000  |

NDI<sup>•-</sup> open-shell doublet UCAM-B3LYP 6-311G+ (d,p)  
G energy (IEFPCM, THF) = -1025.975742

| Center<br>Number | Atomic<br>Number | Atomic<br>Type | Coordinates (Angstroms) |           |           |
|------------------|------------------|----------------|-------------------------|-----------|-----------|
|                  |                  |                | X                       | Y         | Z         |
| 1                | 6                | 0              | -0.694088               | 2.436486  | 0.000022  |
| 2                | 6                | 0              | -1.405557               | 1.225223  | 0.000010  |
| 3                | 6                | 0              | 0.681156                | 2.440006  | 0.000021  |
| 4                | 6                | 0              | -0.713970               | -0.001867 | -0.000003 |
| 5                | 6                | 0              | -2.857208               | 1.229721  | 0.000012  |
| 6                | 6                | 0              | 1.400194                | 1.232714  | 0.000011  |
| 7                | 1                | 0              | 1.233876                | 3.370131  | 0.000028  |
| 8                | 6                | 0              | -1.400194               | -1.232714 | -0.000019 |
| 9                | 6                | 0              | 0.713970                | 0.001867  | 0.000000  |
| 10               | 7                | 0              | -3.496011               | -0.010608 | 0.000003  |
| 11               | 8                | 0              | -3.537660               | 2.255592  | 0.000027  |
| 12               | 6                | 0              | 2.852800                | 1.252993  | 0.000009  |
| 13               | 6                | 0              | -2.852800               | -1.252993 | -0.000025 |
| 14               | 6                | 0              | -0.681156               | -2.440006 | -0.000031 |
| 15               | 6                | 0              | 1.405557                | -1.225223 | -0.000009 |
| 16               | 6                | 0              | -4.955961               | 0.018590  | 0.000007  |
| 17               | 7                | 0              | 3.496011                | 0.010608  | 0.000017  |
| 18               | 8                | 0              | 3.511947                | 2.292204  | 0.000003  |
| 19               | 8                | 0              | -3.511947               | -2.292204 | -0.000051 |
| 20               | 6                | 0              | 0.694088                | -2.436486 | -0.000026 |
| 21               | 1                | 0              | -1.233876               | -3.370131 | -0.000045 |
| 22               | 6                | 0              | 2.857208                | -1.229721 | -0.000002 |
| 23               | 1                | 0              | -5.312158               | -1.005419 | -0.000002 |
| 24               | 1                | 0              | -5.317984               | 0.543693  | 0.883354  |
| 25               | 1                | 0              | -5.317989               | 0.543708  | -0.883330 |
| 26               | 6                | 0              | 4.955961                | -0.018590 | 0.000025  |
| 27               | 8                | 0              | 3.537660                | -2.255592 | -0.000009 |
| 28               | 1                | 0              | 5.317994                | -0.543667 | -0.883334 |
| 29               | 1                | 0              | 5.312158                | 1.005419  | 0.000065  |
| 30               | 1                | 0              | 5.317979                | -0.543734 | 0.883350  |
| 31               | 1                | 0              | -1.251766               | 3.363738  | 0.000032  |
| 32               | 1                | 0              | 1.251766                | -3.363738 | -0.000033 |

NDI close-shell singlet RCAM-B3LYP 6-311G+ (d,p)

G energy (gas phase) = -1025.823890

| Center<br>Number | Atomic<br>Number | Atomic<br>Type | Coordinates (Angstroms) |           |           |
|------------------|------------------|----------------|-------------------------|-----------|-----------|
|                  |                  |                | X                       | Y         | Z         |
| 1                | 6                | 0              | 2.410813                | 0.711036  | 0.000000  |
| 2                | 6                | 0              | 1.222910                | 1.400249  | 0.000000  |
| 3                | 6                | 0              | 2.415678                | -0.693839 | 0.000000  |
| 4                | 6                | 0              | -0.002592               | 0.704415  | 0.000000  |
| 5                | 6                | 0              | 1.225722                | 2.884863  | 0.000000  |
| 6                | 6                | 0              | 1.232950                | -1.392493 | 0.000000  |
| 7                | 1                | 0              | 3.346775                | -1.245655 | 0.000000  |
| 8                | 6                | 0              | -1.232950               | 1.392493  | 0.000000  |
| 9                | 6                | 0              | 0.002592                | -0.704415 | 0.000000  |
| 10               | 7                | 0              | -0.014238               | 3.522727  | 0.000000  |
| 11               | 8                | 0              | 2.247597                | 3.532532  | 0.000000  |
| 12               | 6                | 0              | 1.254400                | -2.878876 | 0.000000  |
| 13               | 6                | 0              | -1.254400               | 2.878876  | 0.000000  |
| 14               | 6                | 0              | -2.415678               | 0.693839  | 0.000000  |
| 15               | 6                | 0              | -1.222910               | -1.400249 | 0.000000  |
| 16               | 6                | 0              | 0.014238                | 4.986297  | 0.000000  |
| 17               | 7                | 0              | 0.014238                | -3.522727 | 0.000000  |
| 18               | 8                | 0              | 2.289934                | -3.503599 | 0.000000  |
| 19               | 8                | 0              | -2.289934               | 3.503599  | 0.000000  |
| 20               | 6                | 0              | -2.410813               | -0.711036 | 0.000000  |
| 21               | 1                | 0              | -3.346775               | 1.245655  | 0.000000  |
| 22               | 6                | 0              | -1.225722               | -2.884863 | 0.000000  |
| 23               | 1                | 0              | -1.011003               | 5.340259  | 0.000000  |
| 24               | 1                | 0              | 0.540874                | 5.344141  | 0.883517  |
| 25               | 1                | 0              | 0.540874                | 5.344141  | -0.883517 |
| 26               | 6                | 0              | -0.014238               | -4.986297 | 0.000000  |
| 27               | 8                | 0              | -2.247597               | -3.532532 | 0.000000  |
| 28               | 1                | 0              | -0.540874               | -5.344141 | -0.883517 |
| 29               | 1                | 0              | 1.011003                | -5.340259 | 0.000000  |
| 30               | 1                | 0              | -0.540874               | -5.344141 | 0.883517  |
| 31               | 1                | 0              | 3.338016                | 1.269516  | 0.000000  |
| 32               | 1                | 0              | -3.338016               | -1.269516 | 0.000000  |



NDI<sup>•-</sup> open-shell doublet UCAM-B3LYP 6-311G+ (d,p)  
G energy (gas phase) = -1025.915074

| Center<br>Number | Atomic<br>Number | Atomic<br>Type | Coordinates (Angstroms) |           |           |
|------------------|------------------|----------------|-------------------------|-----------|-----------|
|                  |                  |                | X                       | Y         | Z         |
| 1                | 6                | 0              | 2.437257                | 0.694723  | 0.000000  |
| 2                | 6                | 0              | 1.225797                | 1.405490  | 0.000000  |
| 3                | 6                | 0              | 2.441318                | -0.680362 | 0.000000  |
| 4                | 6                | 0              | -0.002127               | 0.714562  | 0.000000  |
| 5                | 6                | 0              | 1.234352                | 2.858250  | 0.000000  |
| 6                | 6                | 0              | 1.234352                | -1.399579 | 0.000000  |
| 7                | 1                | 0              | 3.367029                | -1.240955 | 0.000000  |
| 8                | 6                | 0              | -1.234352               | 1.399579  | 0.000000  |
| 9                | 6                | 0              | 0.002127                | -0.714562 | 0.000000  |
| 10               | 7                | 0              | -0.011792               | 3.494225  | 0.000000  |
| 11               | 8                | 0              | 2.254500                | 3.541477  | 0.000000  |
| 12               | 6                | 0              | 1.259819                | -2.853106 | 0.000000  |
| 13               | 6                | 0              | -1.259819               | 2.853106  | 0.000000  |
| 14               | 6                | 0              | -2.441318               | 0.680362  | 0.000000  |
| 15               | 6                | 0              | -1.225797               | -1.405490 | 0.000000  |
| 16               | 6                | 0              | 0.016112                | 4.950255  | 0.000000  |
| 17               | 7                | 0              | 0.011792                | -3.494225 | 0.000000  |
| 18               | 8                | 0              | 2.294117                | -3.514454 | 0.000000  |
| 19               | 8                | 0              | -2.294117               | 3.514454  | 0.000000  |
| 20               | 6                | 0              | -2.437257               | -0.694723 | 0.000000  |
| 21               | 1                | 0              | -3.367029               | 1.240955  | 0.000000  |
| 22               | 6                | 0              | -1.234352               | -2.858250 | 0.000000  |
| 23               | 1                | 0              | -1.011339               | 5.299959  | 0.000000  |
| 24               | 1                | 0              | 0.546514                | 5.313150  | 0.880977  |
| 25               | 1                | 0              | 0.546514                | 5.313150  | -0.880977 |
| 26               | 6                | 0              | -0.016112               | -4.950255 | 0.000000  |
| 27               | 8                | 0              | -2.254500               | -3.541477 | 0.000000  |
| 28               | 1                | 0              | -0.546514               | -5.313150 | -0.880977 |
| 29               | 1                | 0              | 1.011339                | -5.299959 | 0.000000  |
| 30               | 1                | 0              | -0.546514               | -5.313150 | 0.880977  |
| 31               | 1                | 0              | 3.359674                | 1.260912  | 0.000000  |
| 32               | 1                | 0              | -3.359674               | -1.260912 | 0.000000  |

[NDI...F]<sup>-</sup> close-shell singlet RCAM-B3LYP 6-311G+ (d,p) for NDI, LanL2DZPD for F  
G energy (gas phase) = -1125.395851

| Center Number | Atomic Number | Atomic Type | Coordinates (Angstroms) |           |           |
|---------------|---------------|-------------|-------------------------|-----------|-----------|
|               |               |             | X                       | Y         | Z         |
| 1             | 6             | 0           | 0.920304                | 2.446650  | 0.077437  |
| 2             | 6             | 0           | 1.594579                | 1.243624  | 0.031532  |
| 3             | 6             | 0           | -0.482217               | 2.480169  | 0.036431  |
| 4             | 6             | 0           | 0.872893                | 0.029333  | -0.038588 |
| 5             | 6             | 0           | 3.060430                | 1.213320  | 0.050287  |
| 6             | 6             | 0           | -1.205649               | 1.310340  | -0.031005 |
| 7             | 1             | 0           | -1.024742               | 3.412936  | 0.041206  |
| 8             | 6             | 0           | 1.536477                | -1.218288 | -0.100823 |
| 9             | 6             | 0           | -0.540156               | 0.063577  | -0.046233 |
| 10            | 7             | 0           | 3.675547                | -0.039252 | -0.011336 |
| 11            | 8             | 0           | 3.766084                | 2.238518  | 0.115587  |
| 12            | 6             | 0           | -2.688559               | 1.369989  | -0.157677 |
| 13            | 6             | 0           | 2.997819                | -1.269267 | -0.092392 |
| 14            | 6             | 0           | 0.794303                | -2.382164 | -0.180509 |
| 15            | 6             | 0           | -1.272190               | -1.143574 | -0.094947 |
| 16            | 6             | 0           | 5.139946                | -0.049738 | 0.008527  |
| 17            | 7             | 0           | -3.352175               | 0.195591  | -0.282254 |
| 18            | 8             | 0           | -3.271278               | 2.481523  | -0.215738 |
| 19            | 8             | 0           | 3.645262                | -2.331787 | -0.154179 |
| 20            | 6             | 0           | -0.607164               | -2.344178 | -0.179042 |
| 21            | 1             | 0           | 1.323023                | -3.322627 | -0.235859 |
| 22            | 6             | 0           | -2.769188               | -1.124492 | -0.001295 |
| 23            | 1             | 0           | 5.460184                | -1.082511 | -0.042904 |
| 24            | 1             | 0           | 5.527152                | 0.513790  | -0.836982 |
| 25            | 1             | 0           | 5.501585                | 0.419075  | 0.920428  |
| 26            | 6             | 0           | -4.801608               | 0.241782  | -0.421016 |
| 27            | 8             | 0           | -3.426083               | -2.135273 | -0.373158 |
| 28            | 1             | 0           | -5.264904               | 0.555064  | 0.514646  |
| 29            | 1             | 0           | -5.071779               | 0.953909  | -1.196632 |
| 30            | 1             | 0           | -5.122247               | -0.762174 | -0.674237 |
| 31            | 1             | 0           | 1.497611                | 3.357809  | 0.132899  |
| 32            | 1             | 0           | -1.202467               | -3.242644 | -0.229340 |
| 33            | 9             | 0           | -2.766557               | -1.013705 | 1.724187  |

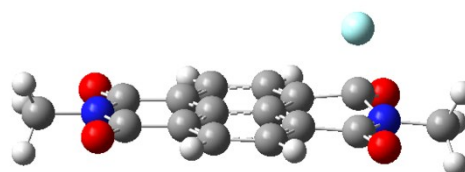

[NDI...OH]<sup>-</sup> close-shell singlet RCAM-B3LYP 6-311G+ (d,p) for NDI, LanL2DZPD for OH  
*G* energy (gas phase) = -1101.358460

| Center<br>Number | Atomic<br>Number | Atomic<br>Type | Coordinates (Angstroms) |           |           |
|------------------|------------------|----------------|-------------------------|-----------|-----------|
|                  |                  |                | X                       | Y         | Z         |
| 1                | 6                | 0              | -0.761454               | 2.316444  | -0.301982 |
| 2                | 6                | 0              | -1.399789               | 0.963774  | -0.140805 |
| 3                | 6                | 0              | 0.726746                | 2.260173  | -0.158124 |
| 4                | 6                | 0              | -0.650245               | -0.218217 | -0.079741 |
| 5                | 6                | 0              | -2.798188               | 0.918292  | -0.091637 |
| 6                | 6                | 0              | 1.429716                | 1.116030  | -0.096410 |
| 7                | 1                | 0              | 1.251614                | 3.204913  | -0.119376 |
| 8                | 6                | 0              | -1.277058               | -1.484920 | -0.005746 |
| 9                | 6                | 0              | 0.777128                | -0.182890 | -0.079337 |
| 10               | 7                | 0              | -3.413102               | -0.355325 | -0.020856 |
| 11               | 8                | 0              | -3.541026               | 1.965340  | -0.090608 |
| 12               | 6                | 0              | 2.899215                | 1.174122  | -0.027595 |
| 13               | 6                | 0              | -2.727619               | -1.562333 | 0.014200  |
| 14               | 6                | 0              | -0.511327               | -2.659036 | 0.042512  |
| 15               | 6                | 0              | 1.508197                | -1.356311 | -0.016370 |
| 16               | 6                | 0              | -4.870672               | -0.422579 | 0.028831  |
| 17               | 7                | 0              | 3.583965                | -0.042340 | 0.018902  |
| 18               | 8                | 0              | 3.551020                | 2.234948  | -0.023043 |
| 19               | 8                | 0              | -3.370247               | -2.644945 | 0.068494  |
| 20               | 6                | 0              | 0.864543                | -2.610176 | 0.036925  |
| 21               | 1                | 0              | -1.044215               | -3.597655 | 0.087957  |
| 22               | 6                | 0              | 2.976761                | -1.308425 | 0.015607  |
| 23               | 1                | 0              | -5.247610               | -0.984467 | -0.823835 |
| 24               | 1                | 0              | -5.188257               | -0.939491 | 0.932371  |
| 25               | 1                | 0              | -5.238840               | 0.595986  | 0.014560  |
| 26               | 6                | 0              | 5.045558                | 0.032388  | 0.070466  |
| 27               | 8                | 0              | 3.684124                | -2.332260 | 0.048176  |
| 28               | 1                | 0              | 5.421273                | 0.560089  | -0.802902 |
| 29               | 1                | 0              | 5.357501                | 0.581849  | 0.955371  |
| 30               | 1                | 0              | 5.424898                | -0.981091 | 0.096746  |
| 31               | 1                | 0              | -0.983966               | 2.712043  | -1.309323 |
| 32               | 1                | 0              | 1.470673                | -3.501016 | 0.080370  |
| 33               | 8                | 0              | -1.269629               | 3.289626  | 0.632471  |
| 34               | 1                | 0              | -2.242109               | 3.172796  | 0.553067  |

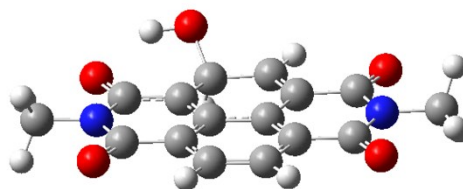

[NDI...2F]<sup>2-</sup> close-shell singlet RCAM-B3LYP 6-311G+ (d,p) for NDI, LanL2DZPD for F  
*G* energy (gas phase) = -1225.211787

| Center Number | Atomic Number | Atomic Type | Coordinates (Angstroms) |           |           |
|---------------|---------------|-------------|-------------------------|-----------|-----------|
|               |               |             | X                       | Y         | Z         |
| 1             | 6             | 0           | 2.291213                | 1.021383  | 0.143369  |
| 2             | 6             | 0           | 1.820903                | -0.252696 | 0.345510  |
| 3             | 6             | 0           | 1.422517                | 2.052784  | -0.258203 |
| 4             | 6             | 0           | 0.440844                | -0.520171 | 0.191776  |
| 5             | 6             | 0           | 2.767928                | -1.347966 | 0.716626  |
| 6             | 6             | 0           | 0.078996                | 1.814131  | -0.437470 |
| 7             | 1             | 0           | 1.790382                | 3.050252  | -0.450828 |
| 8             | 6             | 0           | -0.078996               | -1.814131 | 0.437470  |
| 9             | 6             | 0           | -0.440844               | 0.520171  | -0.191776 |
| 10            | 7             | 0           | 2.113745                | -2.568816 | 1.168925  |
| 11            | 8             | 0           | 3.898250                | -1.077466 | 1.205928  |
| 12            | 6             | 0           | -0.809736               | 2.888092  | -0.930654 |
| 13            | 6             | 0           | 0.809736                | -2.888092 | 0.930654  |
| 14            | 6             | 0           | -1.422517               | -2.052784 | 0.258203  |
| 15            | 6             | 0           | -1.820903               | 0.252696  | -0.345510 |
| 16            | 6             | 0           | 2.991310                | -3.627465 | 1.641554  |
| 17            | 7             | 0           | -2.113745               | 2.568816  | -1.168925 |
| 18            | 8             | 0           | -0.369404               | 4.041859  | -1.182988 |
| 19            | 8             | 0           | 0.369404                | -4.041859 | 1.182988  |
| 20            | 6             | 0           | -2.291213               | -1.021383 | -0.143369 |
| 21            | 1             | 0           | -1.790382               | -3.050252 | 0.450828  |
| 22            | 6             | 0           | -2.767928               | 1.347966  | -0.716626 |
| 23            | 1             | 0           | 2.539663                | -4.125958 | 2.496645  |
| 24            | 1             | 0           | 3.154362                | -4.366081 | 0.855837  |
| 25            | 1             | 0           | 3.930899                | -3.155520 | 1.906369  |
| 26            | 6             | 0           | -2.991310               | 3.627465  | -1.641554 |
| 27            | 8             | 0           | -3.898250               | 1.077466  | -1.205928 |
| 28            | 1             | 0           | -3.154362               | 4.366081  | -0.855837 |
| 29            | 1             | 0           | -2.539663               | 4.125958  | -2.496645 |
| 30            | 1             | 0           | -3.930899               | 3.155520  | -1.906369 |
| 31            | 1             | 0           | 3.347730                | 1.194728  | 0.282774  |
| 32            | 1             | 0           | -3.347730               | -1.194728 | -0.282774 |
| 33            | 9             | 0           | 3.030225                | -1.907691 | -1.008145 |
| 34            | 9             | 0           | -3.030225               | 1.907691  | 1.008145  |

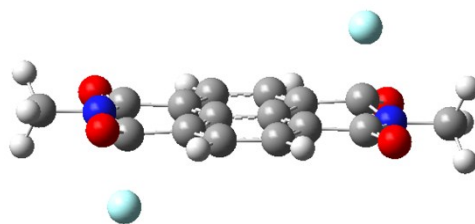

[NDI...2OH]<sup>2-</sup> close-shell singlet RCAM-B3LYP 6-311G+ (d,p) for NDI, LanL2DZPD for OH  
G energy (gas phase) = -1177.074449

| Center<br>Number | Atomic<br>Number | Atomic<br>Type | Coordinates (Angstroms) |           |           |
|------------------|------------------|----------------|-------------------------|-----------|-----------|
|                  |                  |                | X                       | Y         | Z         |
| 1                | 6                | 0              | 0.571248                | -2.469171 | 0.333213  |
| 2                | 6                | 0              | 1.301931                | -1.344229 | 0.169196  |
| 3                | 6                | 0              | -0.920945               | -2.478203 | 0.433525  |
| 4                | 6                | 0              | 0.689195                | -0.036853 | 0.002014  |
| 5                | 6                | 0              | 2.779208                | -1.442056 | 0.151797  |
| 6                | 6                | 0              | -1.514257               | -1.119514 | 0.173254  |
| 7                | 6                | 0              | 1.514257                | 1.119514  | -0.173254 |
| 8                | 6                | 0              | -0.689195               | 0.036853  | -0.002014 |
| 9                | 7                | 0              | 3.484935                | -0.273848 | 0.008953  |
| 10               | 8                | 0              | 3.399249                | -2.534542 | 0.278965  |
| 11               | 6                | 0              | -2.888833               | -1.034179 | 0.145976  |
| 12               | 6                | 0              | 2.888833                | 1.034179  | -0.145976 |
| 13               | 6                | 0              | 0.920945                | 2.478203  | -0.433525 |
| 14               | 6                | 0              | -1.301931               | 1.344229  | -0.169196 |
| 15               | 6                | 0              | 4.937007                | -0.363563 | 0.026574  |
| 16               | 7                | 0              | -3.484935               | 0.273848  | -0.008953 |
| 17               | 8                | 0              | -3.702965               | -2.044992 | 0.236207  |
| 18               | 8                | 0              | 3.702965                | 2.044992  | -0.236207 |
| 19               | 6                | 0              | -0.571248               | 2.469171  | -0.333213 |
| 20               | 6                | 0              | -2.779208               | 1.442056  | -0.151797 |
| 21               | 1                | 0              | 5.308250                | 0.651212  | -0.065425 |
| 22               | 1                | 0              | 5.278140                | -0.824787 | 0.953949  |
| 23               | 1                | 0              | 5.291791                | -0.984834 | -0.796782 |
| 24               | 6                | 0              | -4.937007               | 0.363563  | -0.026574 |
| 25               | 8                | 0              | -3.399249               | 2.534542  | -0.278965 |
| 26               | 1                | 0              | -5.278140               | 0.824787  | -0.953949 |
| 27               | 1                | 0              | -5.308250               | -0.651212 | 0.065425  |
| 28               | 1                | 0              | -5.291791               | 0.984834  | 0.796782  |
| 29               | 1                | 0              | 1.084356                | -3.416879 | 0.422243  |
| 30               | 1                | 0              | -1.084356               | 3.416879  | -0.422243 |
| 31               | 1                | 0              | 1.212894                | 2.829051  | -1.441680 |
| 32               | 1                | 0              | -1.212894               | -2.829051 | 1.441680  |
| 33               | 8                | 0              | 1.464677                | 3.499406  | 0.465478  |
| 34               | 1                | 0              | 2.428105                | 3.325882  | 0.388167  |
| 35               | 8                | 0              | -1.464677               | -3.499406 | -0.465478 |
| 36               | 1                | 0              | -2.428105               | -3.325882 | -0.388167 |

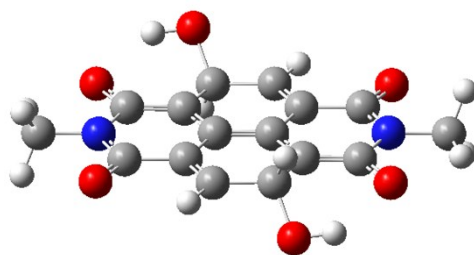

[NDI...F]\* open-shell doublet UCAM-B3LYP 6-311G+ (d,p) for NDI, LanL2DZPD for F  
*G* energy (gas phase) = -1125.243507

| Center Number | Atomic Number | Atomic Type | Coordinates (Angstroms) |           |           |
|---------------|---------------|-------------|-------------------------|-----------|-----------|
|               |               |             | X                       | Y         | Z         |
| 1             | 6             | 0           | -0.986441               | 2.467612  | 0.001980  |
| 2             | 6             | 0           | -1.628764               | 1.250084  | 0.005417  |
| 3             | 6             | 0           | 0.418781                | 2.531103  | -0.006135 |
| 4             | 6             | 0           | -0.880319               | 0.052203  | 0.004592  |
| 5             | 6             | 0           | -3.102699               | 1.188331  | 0.003849  |
| 6             | 6             | 0           | 1.168475                | 1.377945  | -0.003538 |
| 7             | 1             | 0           | 0.934297                | 3.479071  | -0.019166 |
| 8             | 6             | 0           | -1.519337               | -1.209489 | -0.005796 |
| 9             | 6             | 0           | 0.529437                | 0.118155  | 0.013434  |
| 10            | 7             | 0           | -3.694917               | -0.076859 | -0.001644 |
| 11            | 8             | 0           | -3.810123               | 2.204842  | 0.007872  |
| 12            | 6             | 0           | 2.647589                | 1.461590  | -0.022454 |
| 13            | 6             | 0           | -2.996032               | -1.286049 | -0.008673 |
| 14            | 6             | 0           | -0.774033               | -2.365485 | -0.022762 |
| 15            | 6             | 0           | 1.268267                | -1.084069 | -0.002219 |
| 16            | 6             | 0           | -5.164331               | -0.113821 | -0.002311 |
| 17            | 7             | 0           | 3.352726                | 0.276769  | -0.023121 |
| 18            | 8             | 0           | 3.228084                | 2.560225  | -0.033714 |
| 19            | 8             | 0           | -3.591946               | -2.371889 | -0.017035 |
| 20            | 6             | 0           | 0.631774                | -2.305837 | -0.017366 |
| 21            | 1             | 0           | -1.288502               | -3.313989 | -0.037093 |
| 22            | 6             | 0           | 2.768316                | -1.029006 | 0.037357  |
| 23            | 1             | 0           | -5.469810               | -1.151933 | -0.007183 |
| 24            | 1             | 0           | -5.545155               | 0.390754  | 0.881188  |
| 25            | 1             | 0           | -5.544774               | 0.398729  | -0.881373 |
| 26            | 6             | 0           | 4.820948                | 0.320304  | 0.022660  |
| 27            | 8             | 0           | 3.077683                | -1.713055 | 1.222853  |
| 28            | 1             | 0           | 5.238360                | -0.184597 | -0.843448 |
| 29            | 1             | 0           | 5.116199                | 1.362075  | 0.020002  |
| 30            | 1             | 0           | 5.177016                | -0.157426 | 0.934483  |
| 31            | 1             | 0           | -1.582995               | 3.367243  | 0.001015  |
| 32            | 1             | 0           | 1.214992                | -3.212962 | -0.031083 |
| 33            | 9             | 0           | 3.300705                | -1.784307 | -1.030223 |

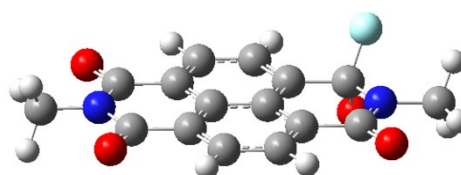

[NDI...OH]<sup>\*</sup> open-shell doublet UCAM-B3LYP 6-311G+ (d,p) for NDI, LanL2DZPD for OH  
*G* energy (gas phase) = -1101.239690

| Center<br>Number | Atomic<br>Number | Atomic<br>Type | Coordinates (Angstroms) |           |           |
|------------------|------------------|----------------|-------------------------|-----------|-----------|
|                  |                  |                | X                       | Y         | Z         |
| 1                | 6                | 0              | -0.761454               | 2.316444  | -0.301982 |
| 2                | 6                | 0              | -1.399789               | 0.963774  | -0.140805 |
| 3                | 6                | 0              | 0.726746                | 2.260173  | -0.158124 |
| 4                | 6                | 0              | -0.650245               | -0.218217 | -0.079741 |
| 5                | 6                | 0              | -2.798188               | 0.918292  | -0.091637 |
| 6                | 6                | 0              | 1.429716                | 1.116030  | -0.096410 |
| 7                | 1                | 0              | 1.251614                | 3.204913  | -0.119376 |
| 8                | 6                | 0              | -1.277058               | -1.484920 | -0.005746 |
| 9                | 6                | 0              | 0.777128                | -0.182890 | -0.079337 |
| 10               | 7                | 0              | -3.413102               | -0.355325 | -0.020856 |
| 11               | 8                | 0              | -3.541026               | 1.965340  | -0.090608 |
| 12               | 6                | 0              | 2.899215                | 1.174122  | -0.027595 |
| 13               | 6                | 0              | -2.727619               | -1.562333 | 0.014200  |
| 14               | 6                | 0              | -0.511327               | -2.659036 | 0.042512  |
| 15               | 6                | 0              | 1.508197                | -1.356311 | -0.016370 |
| 16               | 6                | 0              | -4.870672               | -0.422579 | 0.028831  |
| 17               | 7                | 0              | 3.583965                | -0.042340 | 0.018902  |
| 18               | 8                | 0              | 3.551020                | 2.234948  | -0.023043 |
| 19               | 8                | 0              | -3.370247               | -2.644945 | 0.068494  |
| 20               | 6                | 0              | 0.864543                | -2.610176 | 0.036925  |
| 21               | 1                | 0              | -1.044215               | -3.597655 | 0.087957  |
| 22               | 6                | 0              | 2.976761                | -1.308425 | 0.015607  |
| 23               | 1                | 0              | -5.247610               | -0.984467 | -0.823835 |
| 24               | 1                | 0              | -5.188257               | -0.939491 | 0.932371  |
| 25               | 1                | 0              | -5.238840               | 0.595986  | 0.014560  |
| 26               | 6                | 0              | 5.045558                | 0.032388  | 0.070466  |
| 27               | 8                | 0              | 3.684124                | -2.332260 | 0.048176  |
| 28               | 1                | 0              | 5.421273                | 0.560089  | -0.802902 |
| 29               | 1                | 0              | 5.357501                | 0.581849  | 0.955371  |
| 30               | 1                | 0              | 5.424898                | -0.981091 | 0.096746  |
| 31               | 1                | 0              | -0.983966               | 2.712043  | -1.309323 |
| 32               | 1                | 0              | 1.470673                | -3.501016 | 0.080370  |
| 33               | 8                | 0              | -1.269629               | 3.289626  | 0.632471  |
| 34               | 1                | 0              | -2.242109               | 3.172796  | 0.553067  |

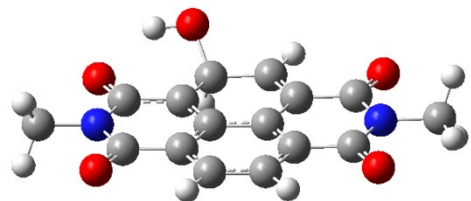

[NDI...2F]<sup>-</sup> open-shell doublet UCAM-B3LYP 6-311G+ (d,p) for NDI, LanL2DZPD for F  
 G energy (gas phase) = -1225.149688

| Center<br>Number | Atomic<br>Number | Atomic<br>Type | Coordinates (Angstroms) |           |           |
|------------------|------------------|----------------|-------------------------|-----------|-----------|
|                  |                  |                | X                       | Y         | Z         |
| 1                | 6                | 0              | 0.882890                | 2.358743  | 0.107030  |
| 2                | 6                | 0              | 1.496303                | 1.111168  | 0.038064  |
| 3                | 6                | 0              | -0.504869               | 2.466309  | 0.099724  |
| 4                | 6                | 0              | 0.708148                | -0.055397 | -0.003192 |
| 5                | 6                | 0              | 2.988037                | 1.037478  | 0.047573  |
| 6                | 6                | 0              | -1.303583               | 1.330559  | 0.049247  |
| 7                | 1                | 0              | -0.996845               | 3.426316  | 0.127451  |
| 8                | 6                | 0              | 1.303583                | -1.330559 | -0.049247 |
| 9                | 6                | 0              | -0.708148               | 0.055397  | 0.003192  |
| 10               | 7                | 0              | 3.508648                | -0.332662 | 0.116804  |
| 11               | 8                | 0              | 3.500375                | 1.867838  | 0.933606  |
| 12               | 6                | 0              | -2.777795               | 1.473997  | -0.003352 |
| 13               | 6                | 0              | 2.777795                | -1.473997 | 0.003352  |
| 14               | 6                | 0              | 0.504869                | -2.466309 | -0.099724 |
| 15               | 6                | 0              | -1.496303               | -1.111168 | -0.038064 |
| 16               | 6                | 0              | 4.958786                | -0.436140 | 0.237675  |
| 17               | 7                | 0              | -3.508648               | 0.332662  | -0.116804 |
| 18               | 8                | 0              | -3.310178               | 2.610491  | 0.009104  |
| 19               | 8                | 0              | 3.310178                | -2.610491 | -0.009104 |
| 20               | 6                | 0              | -0.882890               | -2.358743 | -0.107030 |
| 21               | 1                | 0              | 0.996845                | -3.426316 | -0.127451 |
| 22               | 6                | 0              | -2.988037               | -1.037478 | -0.047573 |
| 23               | 1                | 0              | 5.203204                | -1.371543 | 0.729092  |
| 24               | 1                | 0              | 5.430864                | -0.415520 | -0.744280 |
| 25               | 1                | 0              | 5.294543                | 0.415948  | 0.820955  |
| 26               | 6                | 0              | -4.958786               | 0.436140  | -0.237675 |
| 27               | 8                | 0              | -3.500375               | -1.867838 | -0.933606 |
| 28               | 1                | 0              | -5.430864               | 0.415520  | 0.744280  |
| 29               | 1                | 0              | -5.203204               | 1.371543  | -0.729092 |
| 30               | 1                | 0              | -5.294543               | -0.415948 | -0.820955 |
| 31               | 1                | 0              | 1.517088                | 3.227979  | 0.175075  |
| 32               | 1                | 0              | -1.517088               | -3.227979 | -0.175075 |
| 33               | 9                | 0              | 3.402897                | 1.478096  | -1.345250 |
| 34               | 9                | 0              | -3.402897               | -1.478096 | 1.345250  |

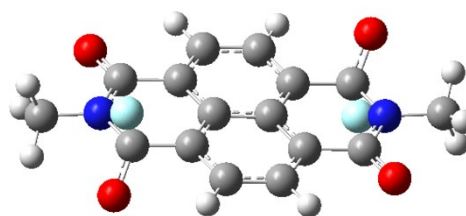



[NDI...2OH]<sup>•-</sup> open-shell doublet UCAM-B3LYP 6-311G+ (d,p) for NDI, LanL2DZPD for OH  
G energy (gas phase) = -1177.124421

| Center Number | Atomic Number | Atomic Type | Coordinates (Angstroms) |           |           |
|---------------|---------------|-------------|-------------------------|-----------|-----------|
|               |               |             | X                       | Y         | Z         |
| 1             | 6             | 0           | 0.473967                | -2.496037 | 0.193851  |
| 2             | 6             | 0           | 1.259096                | -1.407699 | 0.093326  |
| 3             | 6             | 0           | -1.015930               | -2.431987 | 0.296456  |
| 4             | 6             | 0           | 0.705334                | -0.067183 | -0.000121 |
| 5             | 6             | 0           | 2.726400                | -1.576092 | 0.054269  |
| 6             | 6             | 0           | -1.543768               | -1.031883 | 0.112810  |
| 7             | 6             | 0           | 1.543768                | 1.031883  | -0.112810 |
| 8             | 6             | 0           | -0.705334               | 0.067183  | 0.000121  |
| 9             | 7             | 0           | 3.489887                | -0.425670 | -0.037994 |
| 10            | 8             | 0           | 3.286605                | -2.691410 | 0.115808  |
| 11            | 6             | 0           | -2.952838               | -0.882927 | 0.111176  |
| 12            | 6             | 0           | 2.952838                | 0.882927  | -0.111176 |
| 13            | 6             | 0           | 1.015930                | 2.431987  | -0.296456 |
| 14            | 6             | 0           | -1.259096               | 1.407699  | -0.093326 |
| 15            | 6             | 0           | 4.942172                | -0.589923 | -0.046411 |
| 16            | 7             | 0           | -3.489887               | 0.425670  | 0.037994  |
| 17            | 8             | 0           | -3.752199               | -1.871233 | 0.165085  |
| 18            | 8             | 0           | 3.752199                | 1.871233  | -0.165085 |
| 19            | 6             | 0           | -0.473967               | 2.496037  | -0.193851 |
| 20            | 6             | 0           | -2.726400               | 1.576092  | -0.054269 |
| 21            | 1             | 0           | 5.379283                | 0.399297  | -0.100558 |
| 22            | 1             | 0           | 5.264240                | -1.104871 | 0.856282  |
| 23            | 1             | 0           | 5.245080                | -1.191342 | -0.901117 |
| 24            | 6             | 0           | -4.942172               | 0.589923  | 0.046411  |
| 25            | 8             | 0           | -3.286605               | 2.691410  | -0.115808 |
| 26            | 1             | 0           | -5.264240               | 1.104871  | -0.856282 |
| 27            | 1             | 0           | -5.379283               | -0.399297 | 0.100558  |
| 28            | 1             | 0           | -5.245080               | 1.191342  | 0.901117  |
| 29            | 1             | 0           | 0.929503                | -3.475805 | 0.215255  |
| 30            | 1             | 0           | -0.929503               | 3.475805  | -0.215255 |
| 31            | 1             | 0           | 1.306405                | 2.791194  | -1.298092 |
| 32            | 1             | 0           | -1.306405               | -2.791194 | 1.298092  |
| 33            | 8             | 0           | 1.580465                | 3.365497  | 0.648958  |
| 34            | 1             | 0           | 2.543610                | 3.233809  | 0.547203  |
| 35            | 8             | 0           | -1.580465               | -3.365497 | -0.648958 |
| 36            | 1             | 0           | -2.543610               | -3.233809 | -0.547203 |

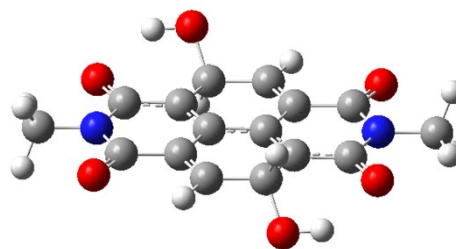

## References

1. Guo S., Wu W., Guo H., Zhao J., *J. Org. Chem.*, 2012, 77, 3933-3943.
2. Frisch, M. J.; Trucks, G. W.; Schlegel, H. B.; Scuseria, G. E.; Robb, M. A.; Cheeseman, J. R.; Scalmani, G.; Barone, V.; Mennucci, B.; Petersson, G. A.; Nakatsuji, H.; Caricato, M.; Li, X.; Hratchian, H. P.; Izmaylov, A. F.; Bloino, J.; Zheng, G.; Sonnenberg, J. L.; Hada, M.; Ehara, M.; Toyota, K.; Fukuda, R.; Hasegawa, J.; Ishida, M.; Nakajima, T.; Honda, Y.; Kitao, O.; Nakai, H.; Vreven, T.; Montgomery, J. A., Jr.; Peralta, J. E.; Ogliaro, F.; Bearpark, M.; Heyd, J. J.; Brothers, E.; Kudin, K. N.; Staroverov, V. N.; Kobayashi, R.; Normand, J.; Raghavachari, K.; Rendell, A.; Burant, J. C.; Iyengar, S. S.; Tomasi, J.; Cossi, M.; Rega, N.; Millam, M. J.; Klene, M.; Knox, J. E.; Cross, J. B.; Bakken, V.; Adamo, C.; Jaramillo, J.; Gomperts, R.; Stratmann, R. E.; Yazyev, O.; Austin, A. J.; Cammi, R.; Pomelli, C.; Ochterski, J. W.; Martin, R. L.; Morokuma, K.; Zakrzewski, V. G.; Voth, G. A.; Salvador, P.; Dannenberg, J. J.; Dapprich, S.; Daniels, A. D.; Farkas, Ö.; Foresman, J. B.; Ortiz, J. V.; Cioslowski, J.; Fox, D. J. *Gaussian 09, Revision A.02*, Gaussian, Inc.: Wallingford CT, 2009.
3. C.E. Check, T.O. Faust, J.M. Bailey, B.J. Wright, T.M. Gilbert and L.S. Sunderlin, *J. Phys. Chem. A*, 2011, 105, 8111-8116.
